# Supplementary material for: Composite plants for a composite plant: An efficient protocol for root studies in the sunflower using composite plants approach
Source: bioRxiv or medRxiv preprint supplement (doi:10.1101/712760), 2019-07-24
Supplement: Supplementary file [file media-2.pdf]

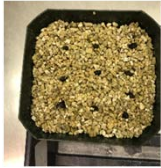

## **Day 0**

Plant seeds

**Supplemental Fig. 1.** Timeline for composite sunflower production. Pictures are the same as in the Fig.1 and are used to envision the main outcome for the stages in the procedure.

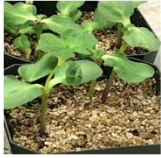

## **Day 1 - 14**

Grow plantlets

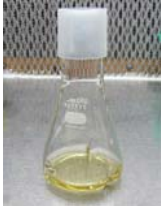

## **Day 12**

Culture bacteria

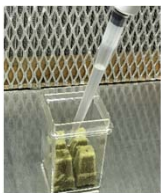

## **Day 15**

Rockwool plug with *A. rhizogenes*

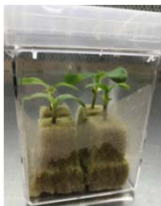

## **Day 16 - 29**

Plant transformation

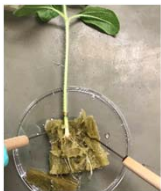

## **Day 30**

Removal from rockwool

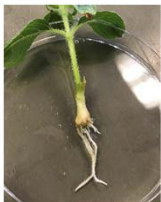

## **Day 31 - 44**

Cultivation in vermiculite

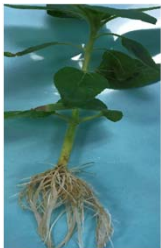

## **Day 45**

Composite plants transfer to soil/hydroponics

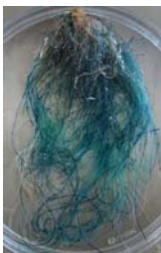

## **Day 65**

Characterization of the fully developed roots
